# Supplementary material for: Genome-wide comparison of DNA hydroxymethylation in mouse embryonic stem cells and neural progenitor cells by a new comparative hMeDIP-seq method
Source: PubMed Central journal article supplement — Nucleic Acids Res. 2013 Feb 12;41(7):e84. doi: 10.1093/nar/gkt091 (PMC3627583; doi:10.1093/nar/gkt091), 2013-02-12

**Supplementary Table S1. Primer sequences for RT-qPCR**

| <b>Primer name</b> | <b>Sequence</b>                |
|--------------------|--------------------------------|
| Gapdh-F            | 5'-GTG TTCCTACCCCAATGTGT-3'    |
| Gapdh-R            | 5'-ATTGTCATACCAGGAAATGAGCTT-3' |
| Tet1-F             | 5'-CGAAAGAACAGCCACCAGAT-3'     |
| Tet1-R             | 5'-TTGCTCTTCTTCCCATGAC-3'      |
| Tet2-F             | 5'-GTTGCAAGAAGAAAGCGGAG-3'     |
| Tet2-R             | 5'-CTCTGCCCTTGCTGAAGGT-3'      |
| Tet3-F             | 5'-TCCGGATTGAGAAGGTCATC-3'     |
| Tet3-R             | 5'-CCAGGCCAGGATCAAGATAA-3'     |
| Nanog-F            | 5'-AACCAAAGGATGAAGTGCAAGCGG-3' |
| Nanog-R            | 5'-TCCAAGTTGGGTTGGTCCAAGTCT-3' |
| Oct4-F             | 5'-TGGCGTGGAGACTTTGCA-3'       |
| Oct4-R             | 5'-GAGGTTCCCTCTGAGTTGCTTTC-3'  |
| Zfp42-F            | 5'-TCACTGTGCTGCCTCCAAGT-3'     |
| Zfp42-R            | 5'-GGGCACTGATCCGCAAAC-3'       |
| Klf4-F             | 5'-CGAACTCACACAGGCGAGAA-3'     |
| Klf4-R             | 5'-CGGAGCGGGCGAATTT-3'         |
| Pax6-F             | 5'-GGGAAAGACTAGCAGCCAAA-3'     |
| Pax6-R             | 5'-TGAAGCTGCTGCTGATAGGA-3'     |
| Sox1-F             | 5'-GCAGCGTTTCCGTGACTTTAT-3'    |
| Sox1-R             | 5'-GGCAGAACCACAGGAAAGAAA-3'    |
| Nestin-F           | 5'-AGGACCAGGTGCTTGAGAGA-3'     |
| Nestin-R           | 5'-TTCGAGAGATTCGAGGGAGA-3'     |

**Supplementary Table S2. Summary of the quantitative hMeDIP-seq data of ESCs and NPCs**

| <b>Sample name</b> | <b>Number of reads<br/>(total)</b> | <b>Alignment rate</b> | <b>Number of reads<br/>(aligned)</b> |
|--------------------|------------------------------------|-----------------------|--------------------------------------|
| ESCs_hMeDIP        | 9734647                            | 86%                   | 8367222                              |
| NPCs_hMeDIP        | 2849614                            | 82%                   | 2328130                              |
| ESCs_Input         | 8938949                            | 66%                   | 5885173                              |
| NPCs_Input         | 9310138                            | 82%                   | 7591632                              |

**Supplementary Table S3. Primer sequences for hMeDIP-qPCR**

| <b>Primer name</b> | <b>Sequence</b>      |
|--------------------|----------------------|
| Ankrd23-F          | TAGTCCCGGAGCTTTCTCCT |
| Ankrd23-R          | CCCACAGAAGCCAGGATCTA |
| Hist1h2aa-F        | CAACAAGAAGACGCGCATT  |
| Hist1h2aa-R        | ACTTGGTCTGGGACTTGTGG |
| Ftl1-F             | GCCCTTAGTGGAAGGGGTAG |
| Ftl1-R             | TAGATGATGGGTGGGTGGAT |
| Irf2bp2-F          | GCATCTTTTGAGGCGTGACT |
| Irf2bp2-R          | CTTCCACAGAAGGGCTCAAG |

**Supplementary Table S4. Primer sequences for glucMS-qPCR**

| <b>Primer name</b> | <b>Sequence</b>      |
|--------------------|----------------------|
| Ankrd23-F*         | TAGTCCCGGAGCTTTCTCCT |
| Ankrd23-R*         | CCCACAGAAGCCAGGATCTA |
| Hist1h2aa-F        | CCAAGGTCAAGTCTCGCTCT |
| Hist1h2aa-R        | GAGGAGTAATGCGCGTCTTC |
| Ftl1-F*            | GCCCTTAGTGGAAGGGGTAG |
| Ftl1-R*            | TAGATGATGGGTGGGTGGAT |
| Irf2bp2-F*         | GCATCTTTTGAGGCGTGACT |
| Irf2bp2-R*         | CTTCCACAGAAGGGCTCAAG |

\*Same to the primers used in hMeDIP-qPCR

**Supplementary Table S5. GREAT ontology enrichment for “gain of 5hmC” peaks**

| Ontology              | # Term Name                                        | Binom Rank | Binom Raw P-Value | Binom FDR Q-Val | Binom Fold Enrichment | Binom Observed Region Hits | Binom Region Set Coverage | Hyper Rank | Hyper FDR Q-Val | Hyper Fold Enrichment | Hyper Observed Gene Hits | Hyper Total Genes | Hyper Gene Set Coverage |
|-----------------------|----------------------------------------------------|------------|-------------------|-----------------|-----------------------|----------------------------|---------------------------|------------|-----------------|-----------------------|--------------------------|-------------------|-------------------------|
| GO Biological Process | nephron tubule formation                           | 105        | 2.97539e-8        | 2.43217e-6      | 3.3099                | 30                         | 1.09%                     | 504        | 7.29661e-3      | 3.6647                | 8                        | 14                | 0.25%                   |
|                       | regulation of muscle cell differentiation          | 115        | 1.50379e-7        | 1.12235e-5      | 2.0118                | 67                         | 2.44%                     | 238        | 4.59330e-5      | 2.6054                | 26                       | 64                | 0.82%                   |
|                       | oligodendrocyte differentiation                    | 118        | 1.84751e-7        | 1.34383e-5      | 2.2720                | 50                         | 1.82%                     | 460        | 4.63199e-3      | 2.4228                | 17                       | 45                | 0.54%                   |
|                       | nephron tubule morphogenesis                       | 123        | 2.50707e-7        | 1.74944e-5      | 2.9266                | 31                         | 1.13%                     | 493        | 6.88666e-3      | 3.3953                | 9                        | 17                | 0.29%                   |
|                       | segmentation                                       | 127        | 3.96756e-7        | 2.68138e-5      | 2.0166                | 62                         | 2.26%                     | 328        | 4.03400e-4      | 2.2446                | 28                       | 80                | 0.89%                   |
|                       | limb bud formation                                 | 133        | 7.33052e-7        | 4.73066e-5      | 2.6769                | 33                         | 1.20%                     | 397        | 2.05029e-3      | 4.2755                | 8                        | 12                | 0.25%                   |
|                       | renal tubule morphogenesis                         | 134        | 7.82199e-7        | 5.01016e-5      | 2.6232                | 34                         | 1.24%                     | 532        | 9.04867e-3      | 3.0539                | 10                       | 21                | 0.32%                   |
|                       | regulation of striated muscle cell differentiation | 138        | 8.91190e-7        | 5.54282e-5      | 2.0791                | 54                         | 1.97%                     | 337        | 4.93412e-4      | 2.6177                | 20                       | 49                | 0.63%                   |
|                       | lens fiber cell differentiation                    | 141        | 1.16053e-6        | 7.06441e-5      | 3.1177                | 25                         | 0.91%                     | 267        | 1.11566e-4      | 4.0505                | 12                       | 19                | 0.38%                   |
|                       | regulation of skeletal muscle fiber development    | 145        | 1.35093e-6        | 7.99658e-5      | 2.2926                | 42                         | 1.53%                     | 620        | 1.58856e-2      | 2.4521                | 13                       | 34                | 0.41%                   |
|                       | nephron tubule development                         | 146        | 1.39799e-6        | 8.21844e-5      | 2.2638                | 43                         | 1.56%                     | 495        | 6.99072e-3      | 2.6894                | 13                       | 31                | 0.41%                   |
|                       | lens development in camera-type eye                | 148        | 1.60379e-6        | 9.30090e-5      | 2.0530                | 53                         | 1.93%                     | 329        | 4.06748e-4      | 2.5195                | 22                       | 56                | 0.70%                   |
|                       | renal tubule development                           | 151        | 1.65453e-6        | 9.40454e-5      | 2.2485                | 43                         | 1.56%                     | 593        | 1.19477e-2      | 2.5264                | 13                       | 33                | 0.41%                   |
|                       | nephron epithelium morphogenesis                   | 153        | 2.51941e-6        | 1.41334e-4      | 2.3450                | 38                         | 1.38%                     | 286        | 2.18686e-4      | 3.4533                | 14                       | 26                | 0.44%                   |
|                       | regulation of dendrite development                 | 154        | 2.78759e-6        | 1.55363e-4      | 2.2013                | 43                         | 1.56%                     | 582        | 1.15901e-2      | 2.2250                | 17                       | 49                | 0.54%                   |
|                       | regulation of skeletal muscle tissue development   | 162        | 4.52897e-6        | 2.39952e-4      | 2.0408                | 49                         | 1.78%                     | 582        | 1.15901e-2      | 2.2250                | 17                       | 49                | 0.54%                   |
|                       | metanephric nephron development                    | 163        | 4.63424e-6        | 2.44022e-4      | 2.2274                | 40                         | 1.46%                     | 308        | 3.14458e-4      | 3.2066                | 15                       | 30                | 0.48%                   |
|                       | nephron morphogenesis                              | 167        | 6.09204e-6        | 3.13101e-4      | 2.2539                | 38                         | 1.38%                     | 343        | 5.55597e-4      | 3.2066                | 14                       | 28                | 0.44%                   |
|                       | regulation of stem cell differentiation            | 172        | 7.32042e-6        | 3.65297e-4      | 2.8705                | 24                         | 0.87%                     | 727        | 3.26825e-2      | 3.2066                | 7                        | 14                | 0.22%                   |
|                       | neural precursor cell proliferation                | 177        | 7.82643e-6        | 3.79516e-4      | 2.0317                | 47                         | 1.71%                     | 223        | 2.19033e-5      | 2.8923                | 23                       | 51                | 0.73%                   |

|                                                                                                                                       |                                                                                      |
|---------------------------------------------------------------------------------------------------------------------------------------|--------------------------------------------------------------------------------------|
| The test set of 2,748 genomic regions picked 3,153 genes (16%) of all 20,221 genes.                                                   |                                                                                      |
| GO Biological Process has 8,583 terms covering 15,210 (75%) of all 20,221 genes.                                                      | 8,583 ontology terms were tested (100%) using an annotation count range of [1, Inf]. |
| GREAT version 2.0.2                                                                                                                   |                                                                                      |
| Species assembly: mm9                                                                                                                 |                                                                                      |
| Association rule: Basal+extension: 5000 bp upstream, 1000 bp downstream, 100000 bp max extension, curated regulatory domains included |                                                                                      |

## Supplementary Figure Legends

**Supplementary Figure S1.** Differentiation of mouse ESCs into NPCs via N2B27 serum-free monolayer differentiation *in vitro*. (a) Phase and *Sox1*-GFP of undifferentiated mouse ESCs and ES-derived NPCs. (b) RT-qPCR analysis of mRNA expression of pluripotent marker *Nanog*, *Oct4*, *Zfp42*, and *Klf4* in ESCs and NPCs. (c) RT-qPCR analysis of mRNA expression of neural ectoderm marker *Pax6*, *Sox1*, and *Nestin* in ESCs and NPCs.

**Supplementary Figure S2.** 5hmC distribution at enhancers and DNase I hypersensitive sites (DHS). (a) 5hmC distribution at ESC enhancers (H3K4me1 & H3K27ac) in ESCs and NPCs. (b-d) 5hmC distribution at DHSs of three classes: (b) DHSs lacking H3K4me1 and H3K27ac (left); (c) DHSs with a poised enhancer chromatin signature; and (d) DHSs with an active enhancer chromatin signature.

**Supplementary Figure S3.** Comparison of the hMeDIP-seq data of ESCs generated by quantitative and conventional hMeDIP-seq. (a) Distribution of 5hmC across gene body regions. (b) UCSC browser screen shots of 5hmC enrichment at *Gli1* and *Scnn1a*. (c) The distributions of 5hmC peaks in different genomic features detected by conventional and quantitative hMeDIP-seq. (d) Venn diagram shows the overlapping 5hmC peaks detected by quantitative and conventional hMeDIP-seq.

**Supplementary Figure S4.** GO analysis of the genes with *de novo* DNA hydroxymethylation (NPCs vs. ESCs,  $\log_2$  5hmC density ratio  $\geq 1$ ) at promoters (TSS-/+1kb) or gene body regions (from TSS+1kb to TES).

## Supplementary Figure S1

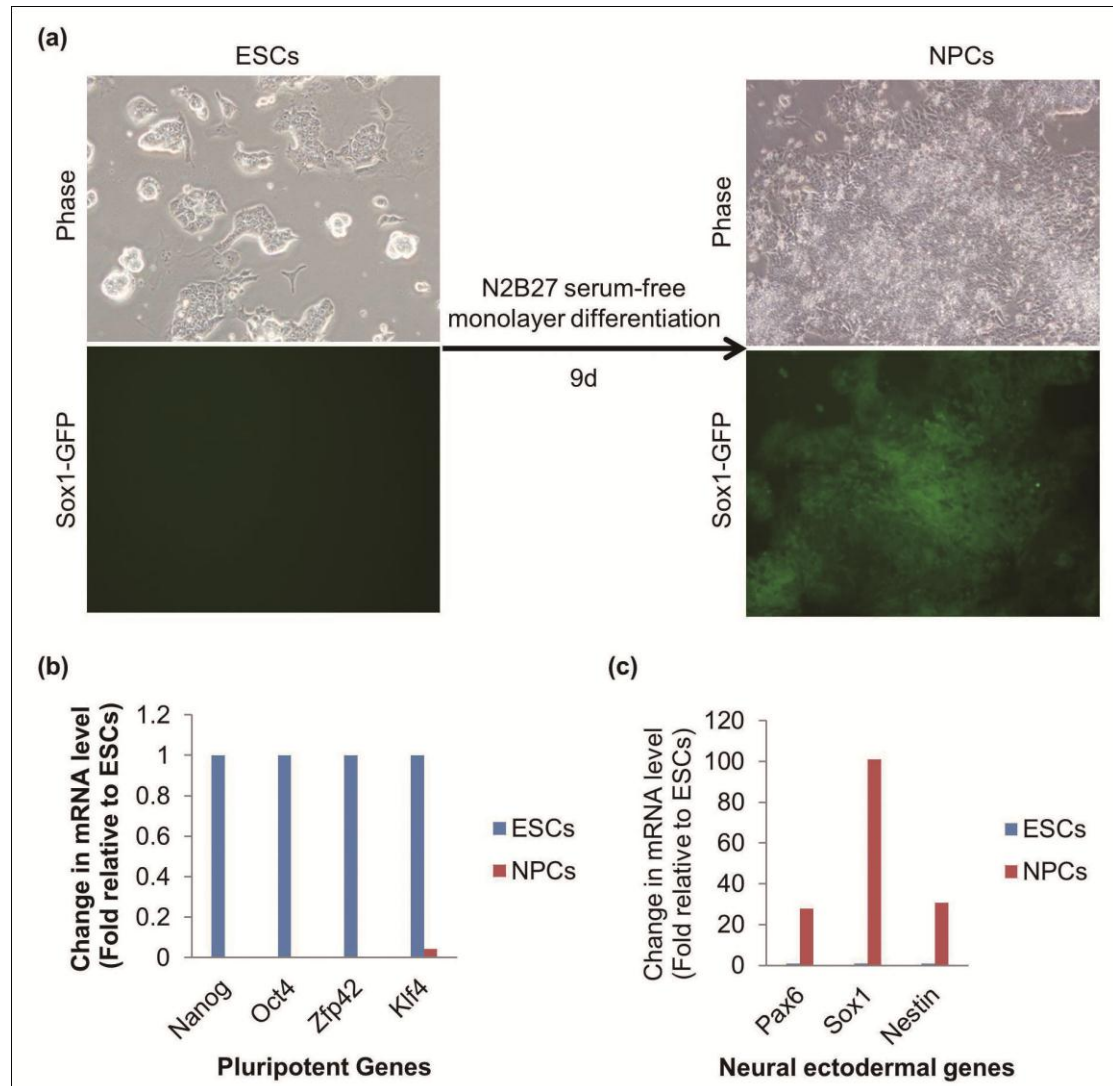

## Supplementary Figure S2

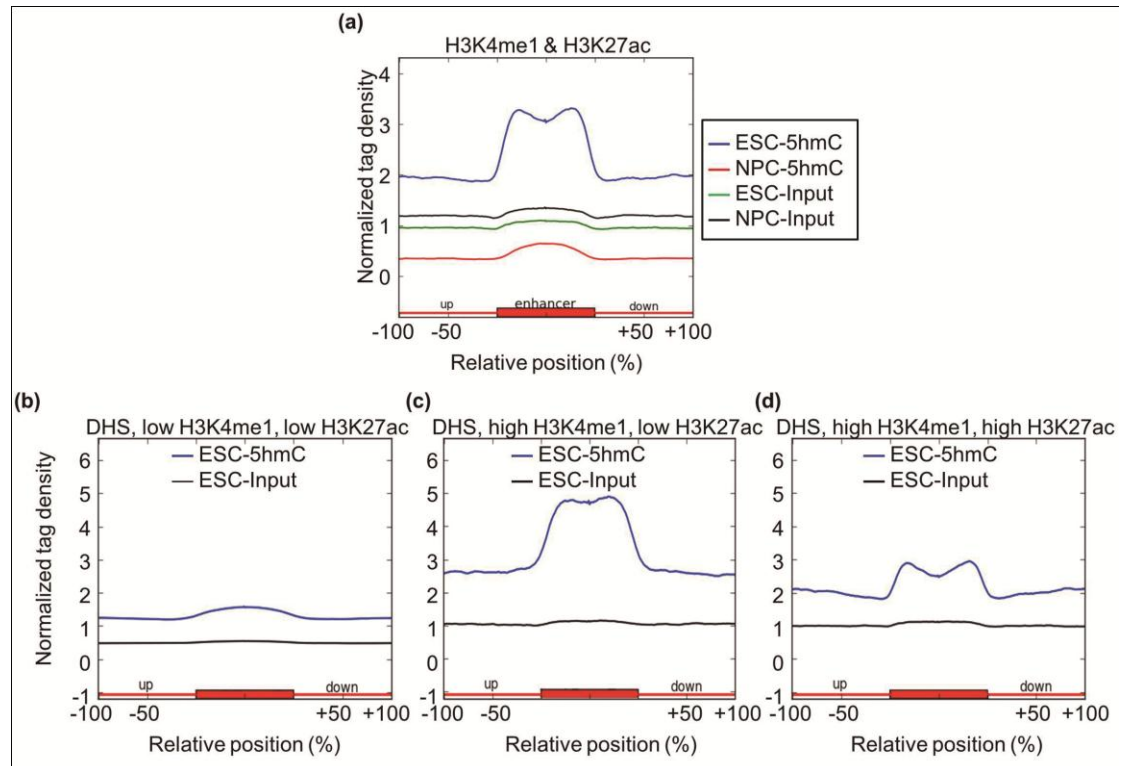



Supplementary Figure S3

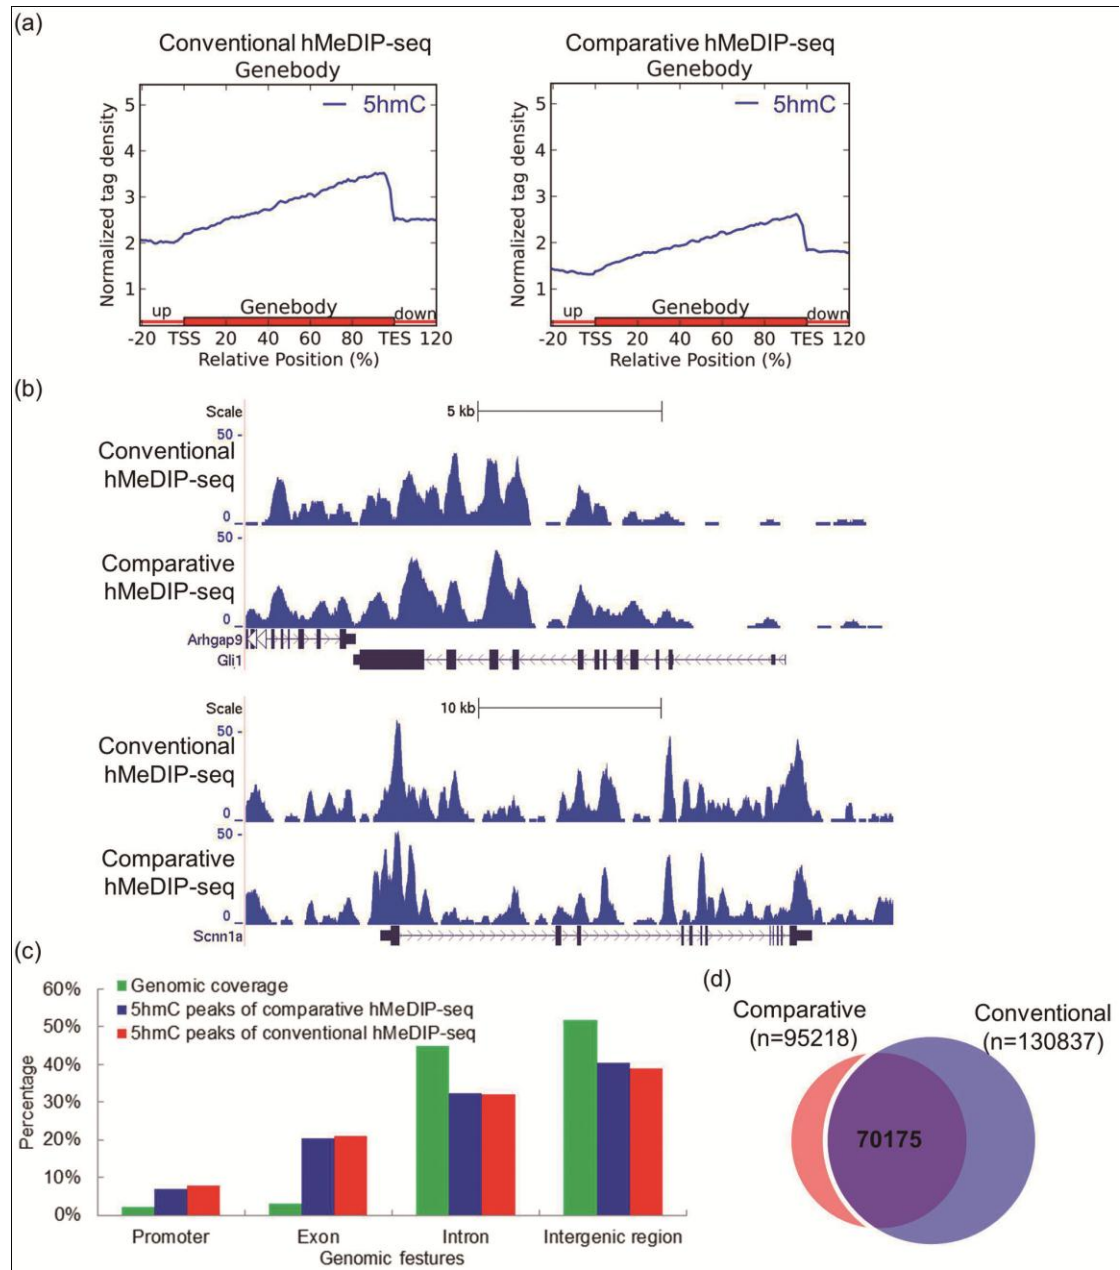

## Supplementary Figure S4

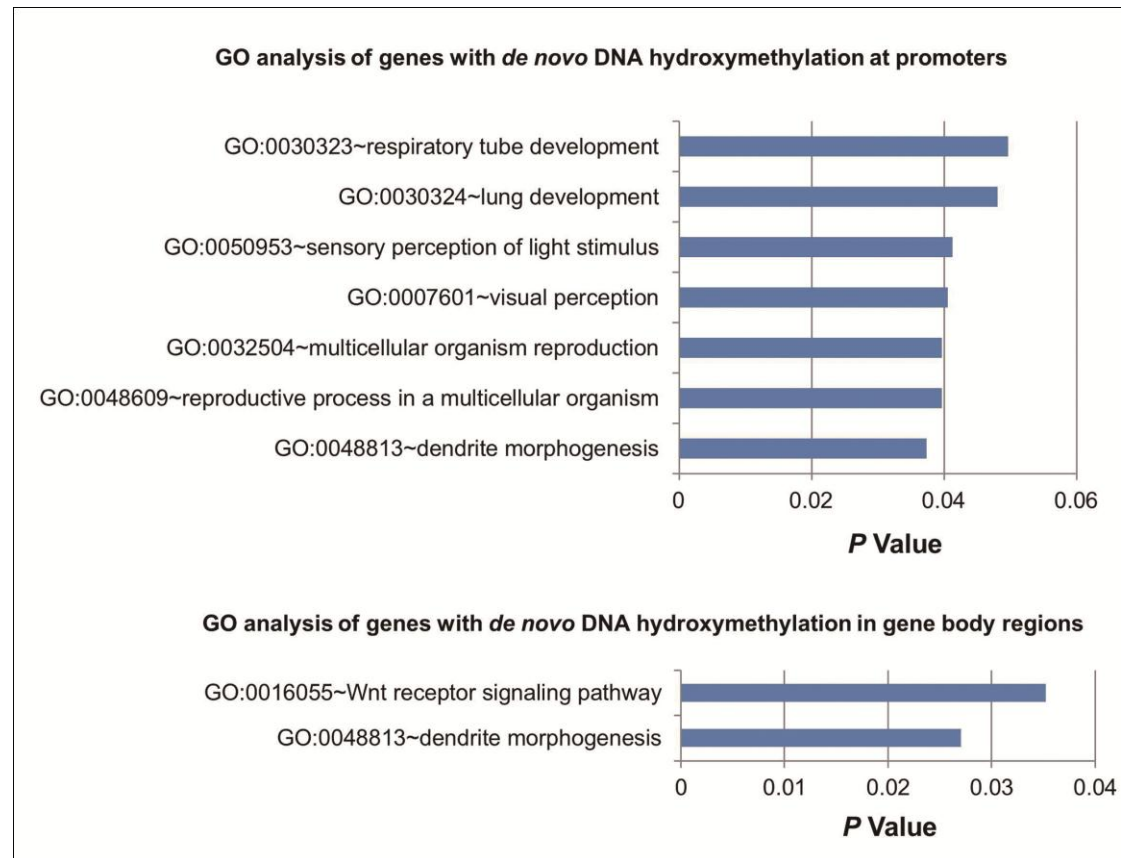

Supplement: supp_gkt091_nar-01781-met-k-2012-File007.pdf [file supp_gkt091_nar-01781-met-k-2012-File007.pdf]
